# Supplementary material for: Genetic Variation for Traits Related to Phosphorus Use Efficiency in Lens Species at the Seedling Stage
Source: MDPI journal article supplement (doi:10.3390/plants10122711), 2021-12-10
Supplement: s1 [file s1]

**Table S1: *Lens* genotypes characterized for traits related to phosphorus use efficiency**

| Sl. No. | Species                                                                  | Genotype(s)                                                                                                                                                                                                                        |
|---------|--------------------------------------------------------------------------|------------------------------------------------------------------------------------------------------------------------------------------------------------------------------------------------------------------------------------|
| 1.      | <i>Lens culinaris</i> subsp.<br><i>culinaris</i><br>Cultivated varieties | L4717, L4147, L4727, L4076, PL06, PL02, DPL62, K75, IPL81, IPL220, JL-1, IPL-321, L4594, DPL15, NDL1, K-75, WBL-77, IPL-316, HUL-57, SEHORE 74-3, PL-05, L-830, L4729, JL-7, HM-1                                                  |
|         | Advanced breeding lines                                                  | L4618, BM4, KBL-104, LH84-8, LL931, L4603, PRECOZ, PL-97, PL117, KLS-218, MC6, L4649, IG69568, IC321808, IC560135, IG136607, I-G-Y-5, IG134340, LL699, IC268238, IPL7103, L 04610, IG129560, L4650, P43120, IG115, IC208352, L4602 |
| 2.      | <i>L. ervoides</i>                                                       | Wild EC 718383, EC 718355, EC718351, EC718330, EC718339, EC718366, EC718347, EC718409, EC718329, EC718348, EC718332, EC718326, EC718331, EC718336                                                                                  |
| 3.      | <i>L.c. ssp. odemensis</i>                                               | EC 718306, EC 718464, EC718283, EC718287, EC718309, EC718312, EC718243, EC718276, EC718677, EC718292, EC718297, EC718281, EC718295, EC718282                                                                                       |
| 4.      | <i>L. lamottei</i>                                                       | EC718692,                                                                                                                                                                                                                          |
| 5.      | <i>L. nigricans</i>                                                      | EC714238                                                                                                                                                                                                                           |
| 6.      | <i>L. orientalis</i>                                                     | ILWL-118                                                                                                                                                                                                                           |

**Table S 2: Classification of genotypes into efficient (E), medium (M) and inefficient (I) types based on five traits recorded under normal and low phosphorus conditions.**

| Genotypes   | Low Phosphorus |       |       |       |     | High Phosphorus |        |                           |      |       |       |       |     |       |        |                           |                           |
|-------------|----------------|-------|-------|-------|-----|-----------------|--------|---------------------------|------|-------|-------|-------|-----|-------|--------|---------------------------|---------------------------|
|             | SD W           | R D W | T D W | R S R | P % | Pu pE           | Pu tiE | Total score/<br>out of 20 | SD W | R D W | T D W | R S R | P % | Pu pE | Pu tiE | Total score/<br>out of 20 | Total score/<br>out of 40 |
| L4717       | M              | M     | M     | M     | E   | M               | M      | 15                        | M    | M     | M     | I     | M   | M     | M      | 13                        | 28                        |
| L4618       | M              | M     | M     | M     | M   | M               | M      | 14                        | M    | M     | M     | M     | M   | M     | M      | 14                        | 28                        |
| L4147       | E              | M     | M     | I     | M   | E               | E      | 16                        | M    | M     | M     | M     | M   | M     | E      | 15                        | 31                        |
| L4727       | E              | M     | E     | I     | M   | M               | M      | 15                        | E    | M     | M     | I     | M   | M     | M      | 14                        | 29                        |
| L4076       | M              | M     | M     | M     | M   | M               | M      | 14                        | M    | I     | M     | I     | M   | M     | M      | 12                        | 26                        |
| BM4         | E              | M     | E     | I     | M   | M               | E      | 16                        | M    | M     | M     | M     | M   | M     | E      | 15                        | 31                        |
| PL06        | E              | E     | E     | M     | M   | M               | E      | 18                        | M    | M     | M     | I     | M   | M     | E      | 14                        | 32                        |
| PL02        | M              | M     | M     | M     | M   | M               | E      | 15                        | I    | I     | I     | M     | M   | M     | E      | 12                        | 27                        |
| DPL62       | E              | E     | E     | I     | M   | M               | E      | 17                        | M    | I     | M     | I     | M   | M     | E      | 13                        | 30                        |
| WBL-81      | E              | E     | E     | M     | M   | M               | E      | 18                        | M    | M     | M     | M     | M   | I     | E      | 14                        | 32                        |
| IPL81       | E              | M     | E     | M     | M   | M               | M      | 16                        | M    | E     | M     | E     | M   | M     | M      | 16                        | 32                        |
| IPL220      | M              | M     | M     | M     | M   | M               | E      | 15                        | I    | I     | I     | M     | E   | M     | E      | 13                        | 28                        |
| JL-1        | I              | I     | I     | M     | E   | M               | M      | 12                        | M    | M     | M     | M     | M   | M     | M      | 14                        | 26                        |
| IPL-321     | M              | M     | M     | M     | M   | M               | I      | 13                        | E    | M     | E     | I     | I   | M     | I      | 13                        | 26                        |
| KBL-104     | M              | M     | M     | M     | M   | M               | M      | 14                        | M    | M     | M     | M     | M   | M     | M      | 14                        | 28                        |
| L4594       | M              | M     | M     | M     | M   | M               | M      | 14                        | M    | M     | M     | M     | M   | M     | M      | 14                        | 28                        |
| LH84-8      | M              | I     | M     | I     | M   | M               | E      | 13                        | I    | M     | I     | E     | E   | M     | E      | 15                        | 28                        |
| LL931       | M              | E     | E     | M     | E   | M               | M      | 17                        | E    | M     | E     | M     | I   | I     | M      | 14                        | 31                        |
| DPL15       | E              | E     | E     | M     | M   | M               | M      | 17                        | E    | E     | E     | M     | I   | I     | M      | 15                        | 32                        |
| NDL1        | M              | E     | M     | E     | M   | M               | M      | 16                        | M    | M     | M     | M     | M   | I     | M      | 13                        | 29                        |
| K-75        | M              | M     | M     | E     | E   | M               | M      | 16                        | M    | M     | M     | M     | M   | M     | M      | 14                        | 30                        |
| WBL-77      | I              | M     | M     | E     | E   | M               | M      | 15                        | I    | M     | I     | E     | E   | E     | M      | 15                        | 30                        |
| IPL-316     | M              | M     | M     | M     | E   | M               | M      | 15                        | M    | M     | M     | M     | M   | M     | M      | 14                        | 29                        |
| L4603       | M              | M     | M     | M     | M   | M               | M      | 14                        | M    | M     | M     | M     | M   | M     | M      | 14                        | 28                        |
| PRECO Z     | I              | M     | I     | E     | E   | M               | M      | 14                        | I    | M     | I     | E     | E   | E     | M      | 15                        | 29                        |
| HUL-57      | E              | M     | E     | I     | M   | M               | E      | 16                        | M    | M     | M     | M     | E   | E     | E      | 17                        | 33                        |
| SEHORE 74-3 | E              | E     | E     | M     | M   | M               | E      | 18                        | M    | M     | M     | M     | M   | M     | E      | 15                        | 33                        |
| PL-97       | E              | E     | E     | I     | I   | M               | E      | 16                        | M    | M     | M     | M     | M   | E     | E      | 16                        | 32                        |
| IPL-406     | M              | M     | M     | M     | I   | M               | I      | 12                        | M    | E     | E     | E     | M   | E     | I      | 17                        | 29                        |
| PL-05       | M              | M     | M     | M     | M   | M               | I      | 13                        | E    | E     | E     | E     | M   | E     | I      | 18                        | 31                        |
| PL117       | M              | M     | M     | M     | M   | M               | I      | 13                        | E    | E     | E     | M     | M   | M     | I      | 16                        | 29                        |
| KLS-218     | M              | M     | M     | M     | M   | M               | I      | 13                        | M    | M     | M     | I     | M   | E     | I      | 13                        | 26                        |
| L-830       | M              | M     | M     | M     | M   | M               | M      | 14                        | M    | M     | M     | M     | E   | M     | M      | 15                        | 29                        |
| L4729       | M              | M     | M     | M     | M   | M               | M      | 14                        | M    | M     | M     | M     | M   | E     | M      | 15                        | 29                        |
| MC6         | E              | E     | E     | M     | E   | M               | M      | 18                        | M    | M     | M     | M     | E   | M     | M      | 15                        | 33                        |
| JL-7        | M              | M     | M     | M     | M   | M               | E      | 15                        | I    | I     | I     | M     | M   | M     | E      | 12                        | 27                        |
| HM-1        | M              | M     | M     | E     | E   | E               | M      | 17                        | I    | M     | I     | E     | M   | M     | M      | 13                        | 30                        |
| L4649       | M              | I     | M     | M     | M   | E               | E      | 15                        | M    | I     | M     | M     | E   | E     | E      | 16                        | 31                        |

|              |   |   |   |   |   |   |   |    |  |   |   |   |   |   |   |   |    |    |
|--------------|---|---|---|---|---|---|---|----|--|---|---|---|---|---|---|---|----|----|
| IG6956<br>8  | M | M | M | M | M | E | M | 15 |  | I | I | I | M | E | M | M | 12 | 27 |
| IC3218<br>08 | M | I | I | M | M | M | E | 13 |  | M | M | M | M | E | M | E | 16 | 29 |
| IC5601<br>35 | M | M | M | M | E | M | I | 14 |  | M | M | M | M | M | M | M | 14 | 28 |
| IG1366<br>07 | M | M | M | M | M | M | M | 14 |  | M | M | M | E | M | M | M | 15 | 29 |
| I-G-Y-<br>50 | M | E | M | M | M | I | M | 14 |  | M | I | M | I | M | M | M | 12 | 26 |
| IG1343<br>40 | M | M | M | M | M | M | E | 15 |  | M | M | M | M | M | M | E | 15 | 30 |
| LL699        | M | M | M | M | M | I | M | 13 |  | M | E | M | E | M | M | M | 16 | 29 |
| IC2682<br>38 | M | M | M | M | M | M | M | 14 |  | E | E | E | M | M | M | M | 17 | 31 |
| IPL710<br>3  | M | M | M | M | M | M | I | 13 |  | E | M | E | M | M | E | I | 16 | 29 |
| L4610        | I | M | M | M | M | M | I | 12 |  | M | M | M | M | M | M | I | 13 | 25 |
| IG1295<br>60 | M | I | M | I | M | M | M | 12 |  | M | M | M | M | M | M | M | 14 | 26 |
| L4650        | M | M | M | M | I | M | I | 12 |  | I | M | I | M | M | M | I | 11 | 23 |
| P43120       | M | M | M | M | M | M | E | 15 |  | I | I | I | M | E | M | E | 13 | 28 |
| IG115        | M | M | M | M | M | M | M | 14 |  | M | M | M | M | M | E | M | 15 | 29 |
| IC2083<br>52 | M | M | M | M | M | M | M | 14 |  | M | E | M | E | M | M | M | 16 | 30 |
| L4602        | M | M | M | M | I | M | M | 13 |  | E | E | E | M | M | M | M | 17 | 30 |
| EC7183<br>83 | M | M | M | M | M | M | I | 13 |  | M | M | M | M | M | M | I | 13 | 26 |
| EC<br>718355 | I | M | M | E | M | M | M | 14 |  | M | M | M | E | M | M | M | 15 | 29 |
| EC<br>718351 | I | M | M | E | I | M | M | 13 |  | M | M | M | M | M | M | M | 14 | 27 |
| EC<br>718306 | I | M | M | E | M | M | M | 14 |  | E | M | E | M | M | M | M | 16 | 30 |
| EC<br>718464 | M | M | M | M | I | M | I | 12 |  | M | M | M | M | M | M | I | 13 | 25 |
| EC7182<br>92 | M | M | M | M | M | M | I | 13 |  | I | M | I | E | M | M | I | 12 | 25 |
| EC7186<br>92 | I | M | M | E | M | M | M | 14 |  | M | M | M | M | E | I | M | 14 | 28 |
| EC7142<br>38 | E | E | E | M | E | M | E | 19 |  | E | E | E | M | M | M | E | 18 | 37 |
| EC7183<br>32 | E | E | E | M | M | E | M | 18 |  | M | M | M | M | I | I | M | 12 | 30 |
| EC7182<br>83 | M | M | M | M | M | E | E | 16 |  | M | M | M | M | I | I | E | 13 | 29 |
| EC7182<br>97 | M | M | M | M | M | E | M | 15 |  | I | M | I | E | I | M | M | 12 | 27 |
| EC7183<br>39 | E | M | E | I | M | E | M | 16 |  | E | E | E | M | E | M | M | 18 | 34 |
| EC7183<br>66 | M | M | M | M | M | E | M | 15 |  | E | E | E | M | I | M | M | 16 | 31 |
| EC7183<br>47 | M | M | M | E | M | M | I | 14 |  | M | M | M | M | M | M | I | 13 | 27 |
| EC7184<br>09 | M | M | M | M | M | M | M | 14 |  | M | M | M | M | M | I | M | 13 | 27 |
| EC7183<br>29 | M | M | M | M | I | M | M | 13 |  | M | M | M | M | M | M | M | 14 | 27 |
| EC7182<br>87 | M | M | M | M | M | M | M | 14 |  | M | M | M | E | M | I | M | 14 | 28 |
| EC7183<br>48 | E | E | E | M | I | M |   | 14 |  | E | E | E | M | I | M | M | 16 | 30 |
| EC7183<br>09 | E | E | E | I | I | E | M | 16 |  | M | M | M | E | I | M | M | 14 | 30 |

|              |   |   |   |   |   |   |   |    |   |   |   |   |   |   |   |    |    |
|--------------|---|---|---|---|---|---|---|----|---|---|---|---|---|---|---|----|----|
| EC7183<br>30 | M | I | M | M | I | E | E | 14 | M | M | M | M | M | M | E | 15 | 29 |
| EC7183<br>26 | M | M | M | M | M | E | M | 15 | M | M | M | M | M | M | M | 14 | 29 |
| EC7183<br>12 | M | M | M | M | I | M | I | 12 | E | E | E | M | M | M | I | 16 | 28 |
| EC7182<br>81 | M | M | M | M | I | M | I | 12 | E | E | E | M | M | I | I | 15 | 27 |
| EC7182<br>95 | M | M | M | M | M | M | I | 13 | E | E | E | M | I | I | I | 14 | 27 |
| EC7183<br>31 | E | M | E | I | M | M | I | 14 | M | M | M | M | I | M | I | 12 | 26 |
| EC7182<br>43 | M | E | M | E | I | M | M | 15 | M | M | M | I | M | M | M | 13 | 28 |
| EC7182<br>76 | M | M | M | E | I | M | M | 14 | M | M | M | I | M | E | M | 14 | 28 |
| EC7182<br>82 | I | M | M | E | I | I | M | 12 | M | M | M | M | E | I | M | 14 | 26 |
| EC7183<br>36 | M | M | M | E | M | I | M | 14 | M | M | M | M | I | M | M | 13 | 27 |
| EC7186<br>77 | E | M | E | I | M | I | M | 14 | M | M | M | M | M | I | M | 13 | 27 |
| ILWL-<br>118 | I | M | M | E | M | I | E | 14 | M | M | M | M | I | M | E | 14 | 28 |

**Table S3: Phosphorus deficiency tolerance indices were calculated for 85 genotypes grown under high and low phosphorus conditions.**

| Genotypes      | Phosphorus Deficiency Tolerance Indices |        |       |       |       |       |       |        |
|----------------|-----------------------------------------|--------|-------|-------|-------|-------|-------|--------|
|                | SSI                                     | MPI    | GMPI  | HMI   | STI   | TI    | SI    | STS    |
| DPL15          | 1.20                                    | 100.53 | 2.88  | 2.91  | 3.37  | 1.43  | -0.66 | 110.46 |
| EC714238       | 0.97                                    | 79.56  | 2.45  | 2.66  | 2.75  | 0.57  | -0.13 | 87.86  |
| EC718348       | 1.00                                    | 79.56  | 2.43  | 2.61  | 2.72  | 0.66  | -0.21 | 87.78  |
| EC718281       | 1.70                                    | 73.97  | 1.38  | 0.69  | 1.37  | 2.75  | -1.76 | 78.40  |
| EC718295       | 1.50                                    | 69.78  | 1.64  | 1.29  | 1.69  | 1.98  | -1.31 | 75.07  |
| PL-05          | 1.59                                    | 66.98  | 1.41  | 0.92  | 1.40  | 2.25  | -1.52 | 71.44  |
| L4727          | 0.65                                    | 62.78  | 2.08  | 2.41  | 2.25  | -0.24 | 0.57  | 69.85  |
| EC718339       | 1.20                                    | 62.78  | 1.78  | 1.78  | 1.86  | 1.03  | -0.65 | 68.58  |
| EC718366       | 1.65                                    | 62.78  | 1.19  | 0.61  | 1.14  | 2.38  | -1.65 | 66.45  |
| LL931          | 1.15                                    | 57.19  | 1.66  | 1.69  | 1.71  | 0.85  | -0.55 | 62.55  |
| IC268238       | 1.60                                    | 53.00  | 1.01  | 0.52  | 0.94  | 2.07  | -1.54 | 56.00  |
| EC718312       | 1.53                                    | 46.01  | 0.93  | 0.55  | 0.85  | 1.75  | -1.39 | 48.69  |
| EC718309       | 0.42                                    | 41.81  | 1.49  | 1.82  | 1.50  | -0.74 | 1.07  | 46.96  |
| PL117          | 1.56                                    | 40.41  | 0.73  | 0.32  | 0.64  | 1.75  | -1.45 | 42.40  |
| L4602          | 1.52                                    | 39.02  | 0.75  | 0.39  | 0.66  | 1.61  | -1.37 | 41.07  |
| IPL81          | 0.93                                    | 36.22  | 1.17  | 1.32  | 1.12  | 0.17  | -0.06 | 39.94  |
| IPL-321        | 1.53                                    | 34.82  | 0.63  | 0.26  | 0.53  | 1.57  | -1.38 | 36.43  |
| PL-97          | 0.27                                    | 27.83  | 1.08  | 1.39  | 1.02  | -1.01 | 1.41  | 31.72  |
| IPL-406        | 1.49                                    | 23.64  | 0.37  | 0.07  | 0.27  | 1.30  | -1.29 | 24.35  |
| EC 718306      | 1.62                                    | 23.64  | 0.19  | -0.28 | 0.09  | 1.66  | -1.59 | 23.70  |
| IPL7103        | 1.58                                    | 22.24  | 0.22  | -0.21 | 0.11  | 1.52  | -1.50 | 22.39  |
| EC718332       | 0.18                                    | 18.04  | 0.78  | 1.08  | 0.69  | -1.15 | 1.61  | 21.06  |
| EC718331       | 0.50                                    | 18.04  | 0.75  | 1.01  | 0.65  | -0.69 | 0.89  | 20.65  |
| PL06           | 0.15                                    | 16.65  | 0.74  | 1.03  | 0.65  | -1.19 | 1.68  | 19.56  |
| EC718326       | 1.39                                    | 15.25  | 0.25  | 0.05  | 0.14  | 0.94  | -1.06 | 15.56  |
| MC6            | 0.11                                    | 12.45  | 0.61  | 0.90  | 0.51  | -1.24 | 1.76  | 14.99  |
| DPL62          | 0.08                                    | 11.05  | 0.57  | 0.85  | 0.47  | -1.28 | 1.84  | 13.50  |
| EC 718464      | 1.40                                    | 12.45  | 0.15  | -0.06 | 0.05  | 0.94  | -1.10 | 12.43  |
| WBL-81         | 0.26                                    | 9.66   | 0.52  | 0.79  | 0.41  | -1.06 | 1.43  | 11.75  |
| IG129560       | 1.39                                    | 11.05  | 0.13  | -0.08 | 0.02  | 0.89  | -1.07 | 10.95  |
| BM4            | 0.40                                    | 6.86   | 0.42  | 0.67  | 0.31  | -0.88 | 1.12  | 8.50   |
| EC718287       | 1.04                                    | 6.86   | 0.25  | 0.30  | 0.14  | 0.12  | -0.29 | 7.38   |
| IC208352       | 1.35                                    | 6.86   | 0.04  | -0.13 | -0.06 | 0.75  | -0.99 | 6.48   |
| SEHORE<br>74-3 | 0.08                                    | 2.67   | 0.31  | 0.57  | 0.20  | -1.28 | 1.83  | 4.30   |
| EC718677       | 0.23                                    | 2.66   | 0.31  | 0.56  | 0.20  | -1.10 | 1.49  | 4.12   |
| HUL-57         | 0.20                                    | 1.27   | 0.27  | 0.51  | 0.16  | -1.15 | 1.57  | 2.63   |
| LL699          | 1.31                                    | 2.67   | -0.05 | -0.19 | -0.14 | 0.62  | -0.90 | 2.01   |
| EC718330       | 1.36                                    | 2.66   | -0.08 | -0.26 | -0.17 | 0.71  | -1.00 | 1.87   |
| EC718383       | 0.99                                    | -0.13  | 0.06  | 0.12  | -0.04 | -0.01 | -0.19 | -0.19  |
| L4717          | 1.19                                    | -0.13  | -0.04 | -0.10 | -0.14 | 0.35  | -0.63 | -0.69  |
| EC718243       | 0.66                                    | -2.93  | 0.08  | 0.25  | -0.02 | -0.56 | 0.55  | -2.62  |
| KBL-104        | 1.11                                    | -2.93  | -0.08 | -0.08 | -0.17 | 0.17  | -0.45 | -3.54  |

|           |      |        |       |       |       |       |       |        |
|-----------|------|--------|-------|-------|-------|-------|-------|--------|
| EC718276  | 1.11 | -2.93  | -0.08 | -0.08 | -0.17 | 0.17  | -0.45 | -3.54  |
| NDL1      | 0.83 | -7.12  | -0.09 | 0.02  | -0.18 | -0.33 | 0.17  | -7.52  |
| IG136607  | 1.11 | -7.12  | -0.20 | -0.21 | -0.28 | 0.12  | -0.44 | -8.13  |
| L4147     | 0.40 | -8.52  | -0.05 | 0.15  | -0.14 | -0.92 | 1.12  | -8.36  |
| EC718347  | 1.17 | -9.92  | -0.32 | -0.37 | -0.38 | 0.21  | -0.59 | -11.36 |
| KLS-218   | 0.85 | -12.72 | -0.27 | -0.17 | -0.34 | -0.33 | 0.12  | -13.70 |
| EC718283  | 0.85 | -12.72 | -0.27 | -0.17 | -0.34 | -0.33 | 0.12  | -13.70 |
| IPL-316   | 0.91 | -12.71 | -0.29 | -0.21 | -0.35 | -0.24 | -0.01 | -13.82 |
| I-G-Y-50  | 0.41 | -14.11 | -0.22 | -0.04 | -0.30 | -0.92 | 1.09  | -14.50 |
| L4603     | 0.95 | -14.11 | -0.34 | -0.29 | -0.40 | -0.20 | -0.10 | -15.43 |
| L4594     | 1.06 | -14.11 | -0.39 | -0.38 | -0.44 | -0.01 | -0.35 | -15.68 |
| EC 718355 | 1.27 | -14.11 | -0.50 | -0.62 | -0.54 | 0.35  | -0.81 | -16.23 |
| IC560135  | 1.21 | -15.51 | -0.50 | -0.58 | -0.54 | 0.21  | -0.66 | -17.57 |
| L4618     | 1.00 | -18.31 | -0.48 | -0.46 | -0.52 | -0.15 | -0.21 | -20.13 |
| L-830     | 0.79 | -19.71 | -0.46 | -0.36 | -0.50 | -0.47 | 0.26  | -21.23 |
| EC718329  | 0.92 | -19.71 | -0.50 | -0.44 | -0.53 | -0.29 | -0.02 | -21.49 |
| IG115     | 1.04 | -19.70 | -0.54 | -0.53 | -0.57 | -0.11 | -0.29 | -21.74 |
| EC718336  | 0.93 | -22.50 | -0.58 | -0.54 | -0.61 | -0.29 | -0.06 | -24.57 |
| K-75      | 0.99 | -22.50 | -0.61 | -0.58 | -0.62 | -0.20 | -0.19 | -24.70 |
| EC 718351 | 1.05 | -26.70 | -0.75 | -0.76 | -0.74 | -0.15 | -0.31 | -29.41 |
| IG134340  | 1.03 | -28.09 | -0.78 | -0.78 | -0.76 | -0.20 | -0.26 | -30.89 |
| L4729     | 1.07 | -29.49 | -0.84 | -0.86 | -0.81 | -0.15 | -0.35 | -32.51 |
| EC718409  | 0.91 | -30.89 | -0.83 | -0.79 | -0.80 | -0.38 | -0.01 | -33.70 |
| L4610     | 1.08 | -32.29 | -0.93 | -0.96 | -0.88 | -0.15 | -0.39 | -35.60 |
| L4076     | 0.47 | -33.69 | -0.83 | -0.70 | -0.80 | -0.92 | 0.97  | -35.97 |
| EC718692  | 0.94 | -36.48 | -1.01 | -0.99 | -0.93 | -0.38 | -0.08 | -39.87 |
| EC718282  | 0.94 | -36.48 | -1.01 | -0.99 | -0.93 | -0.38 | -0.08 | -39.87 |
| ILWL-118  | 0.94 | -36.48 | -1.01 | -0.99 | -0.93 | -0.38 | -0.08 | -39.87 |
| HM-1      | 0.31 | -39.28 | -0.99 | -0.85 | -0.92 | -1.10 | 1.33  | -41.81 |
| L4649     | 0.86 | -40.68 | -1.11 | -1.07 | -1.01 | -0.51 | 0.10  | -44.28 |
| IC321808  | 1.00 | -40.68 | -1.15 | -1.16 | -1.04 | -0.33 | -0.22 | -44.58 |
| PL02      | 0.21 | -42.08 | -1.07 | -0.94 | -0.98 | -1.19 | 1.54  | -44.72 |
| EC718292  | 0.67 | -42.08 | -1.11 | -1.03 | -1.01 | -0.74 | 0.52  | -45.45 |
| IPL220    | 0.27 | -43.47 | -1.11 | -0.99 | -1.01 | -1.15 | 1.42  | -46.31 |
| L4650     | 0.37 | -46.27 | -1.21 | -1.10 | -1.08 | -1.06 | 1.18  | -49.52 |
| EC718297  | 0.65 | -46.27 | -1.24 | -1.16 | -1.10 | -0.78 | 0.57  | -49.98 |
| LH84-8    | 0.33 | -47.67 | -1.25 | -1.14 | -1.10 | -1.10 | 1.29  | -50.97 |
| PRECOZ    | 0.86 | -47.67 | -1.32 | -1.30 | -1.15 | -0.56 | 0.09  | -51.90 |
| JL-1      | 1.29 | -47.67 | -1.47 | -1.62 | -1.26 | -0.01 | -0.84 | -52.88 |
| WBL-77    | 0.75 | -49.07 | -1.34 | -1.29 | -1.17 | -0.69 | 0.35  | -53.21 |
| JL-7      | 0.54 | -53.26 | -1.44 | -1.36 | -1.23 | -0.92 | 0.80  | -57.41 |
| IG69568   | 0.06 | -54.66 | -1.45 | -1.35 | -1.24 | -1.33 | 1.87  | -58.16 |
| P43120    | 0.56 | -56.06 | -1.52 | -1.46 | -1.29 | -0.92 | 0.78  | -60.47 |
